# Supplementary material for: Caries Prevalence Associated with Oral Health-Related Behaviors among Romanian Schoolchildren
Source: MDPI journal article supplement (doi:10.3390/ijerph18126515), 2021-06-17
Supplement: s1 [file s1]

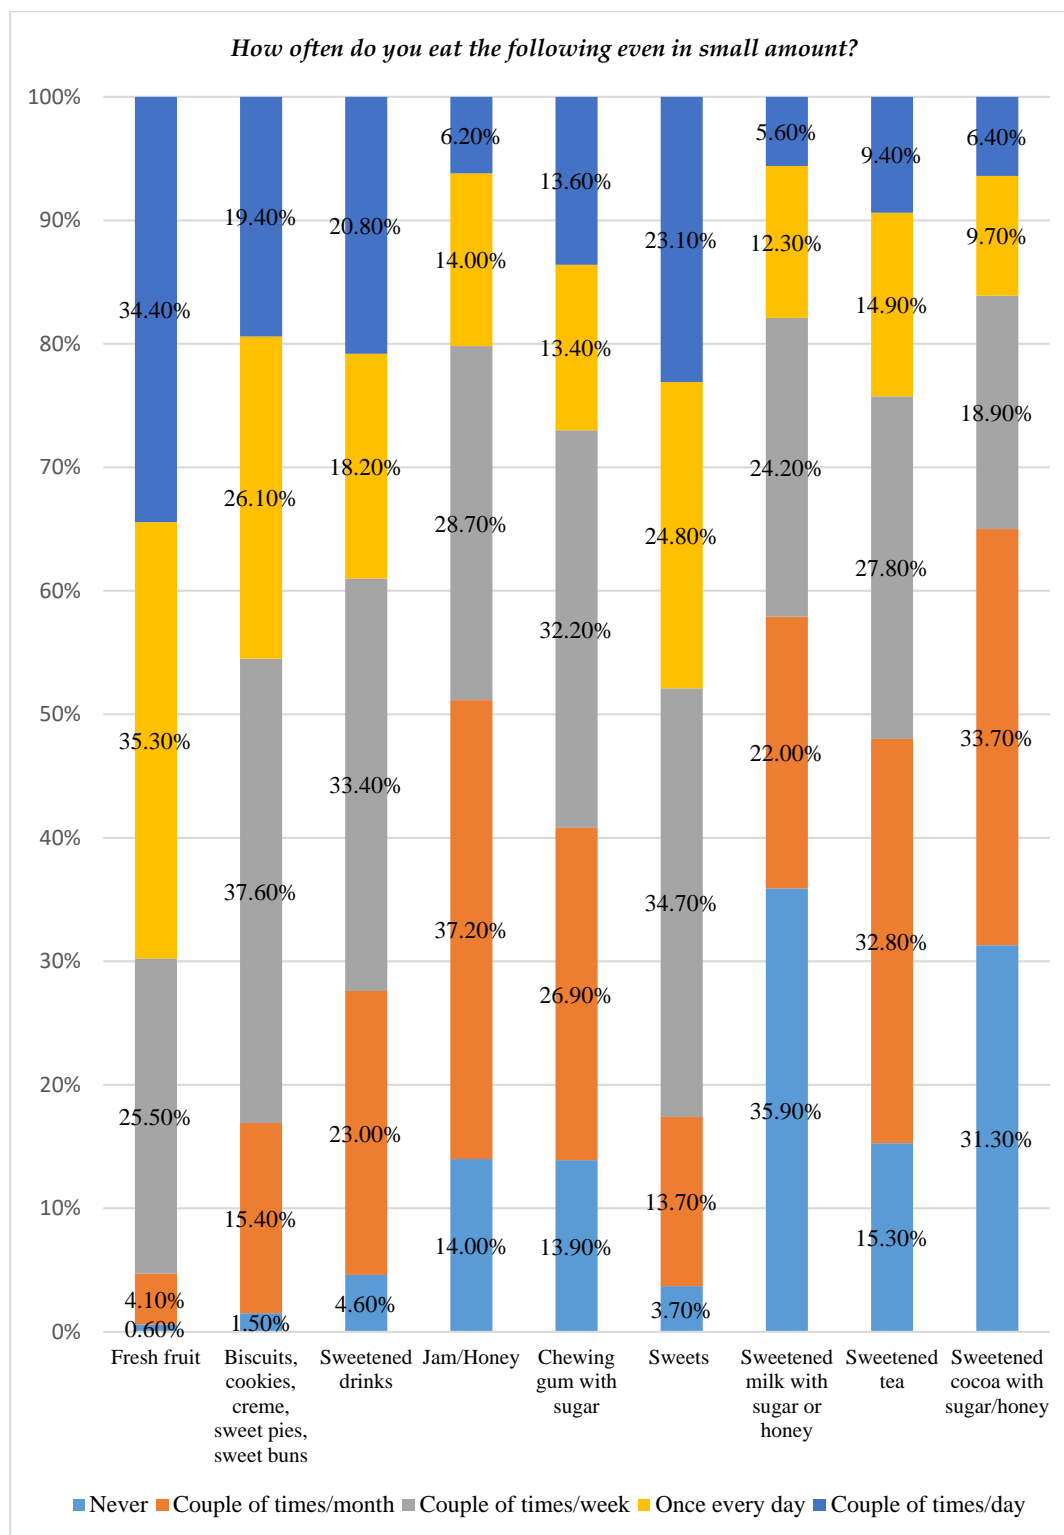

**Figure S1.** Eating behavior of 12 years old children.

**Table S1.** Correlation between fresh fruit consumption and children's demographics

| Fresh fruit                | Gender | Father's education | Mother's education | Residence | Type of city |
|----------------------------|--------|--------------------|--------------------|-----------|--------------|
| <i>Pearson Correlation</i> | 0.00   | - 0.03             | 0.03               | - 0.06    | - 0.00       |
| <i>Sig0. (2-tailed)</i>    | 0.95   | 0.29               | 0.31               | 0.07      | 0.9          |
| <i>N</i>                   | 804    | 802                | 801                | 807       | 807          |

**Table S2.** Correlation between the consumption of biscuits, cakes, cream, sweet pies, buns and the demographic data of children

| Biscuits, cookies, creme, sweet pies, sweet buns | Gender | Father's education | Mother's education | Residence | Type of city |
|--------------------------------------------------|--------|--------------------|--------------------|-----------|--------------|
| <i>Pearson Correlation</i>                       | 0.03   | - 0.08*            | - 0.10**           | - 0.09**  | 0.00         |
| <i>Sig0. (2-tailed)</i>                          | 0.27   | 0.02               | 0.00               | 0.00      | 0.88         |
| <i>N</i>                                         | 797    | 795                | 794                | 800       | 800          |

**Table S3.** Correlation between the consumption of sweetened soft drinks and the demographic data of children.

| Sweetened drinks           | Gender   | Father's education | Mother's education | Residence | Type of city |
|----------------------------|----------|--------------------|--------------------|-----------|--------------|
| <i>Pearson Correlation</i> | - 0.10** | - 0.14**           | - 0.18**           | - 0.18**  | - 0.17**     |
| <i>Sig0. (2-tailed)</i>    | 0.00     | 0.00               | 0.00               | 0.00      | 0.00         |
| <i>N</i>                   | 800      | 798                | 797                | 803       | 803          |

**Table S4.** Correlation between jam / honey consumption and demographic data of children.

| Jam/Honey                  | Gender | Father's education | Mother's education | Residence | Type of city |
|----------------------------|--------|--------------------|--------------------|-----------|--------------|
| <i>Pearson Correlation</i> | - 0.03 | - 0.06             | - 0.01             | 0.11**    | - 0.09*      |
| <i>Sig0. (2-tailed)</i>    | 0.32   | 0.06               | 0.68               | 0.00      | 0.01         |
| <i>N</i>                   | 799    | 797                | 796                | 802       | 802          |

**Table S5.** Correlation between sugar consumption of chewing gum and children's demographics.

| Chewing gum with sugar     | Gender | Father's education | Mother's education | Residence | Type of city |
|----------------------------|--------|--------------------|--------------------|-----------|--------------|
| <i>Pearson Correlation</i> | 0.04   | - 0.06             | - 0.16**           | - 0.08**  | - 0.06       |
| <i>Sig0. (2-tailed)</i>    | 0.22   | 0.08               | 0.00               | 0.01      | 0.06         |
| <i>N</i>                   | 801    | 799                | 798                | 804       | 804          |

**Table S6.** Correlation between the consumption of sweets / candies and the demographic data of children.

| Sweets/ candies            | Gender | Father's education | Mother's education | Residence | Type of city |
|----------------------------|--------|--------------------|--------------------|-----------|--------------|
| <i>Pearson Correlation</i> | 0.04   | - 0.12**           | - 0.16**           | - 0.13**  | - 0.09**     |
| <i>Sig0. (2-tailed)</i>    | 0.16   | 0.00               | 0.00               | 0.00      | 0.00         |
| <i>N</i>                   | 802    | 800                | 799                | 805       | 805          |

**Table S7.** Correlation between milk / sugar / honey consumption and children's demographics.

| Sweetened milk with sugar/honey | Gender | Father's education | Mother's education | Residence | Type of city |
|---------------------------------|--------|--------------------|--------------------|-----------|--------------|
| <i>Pearson Correlation</i>      | - 0.04 | - 0.00             | 0.04               | - 0.10**  | - 0.05       |
| <i>Sig0. (2-tailed)</i>         | 0.19   | 0.90               | 0.22               | 0.00      | 0.11         |
| <i>N</i>                        | 796    | 79                 | 793                | 799       | 799          |

**Table S8.** Correlation between sweetened tea consumption and demographic data of children.

| Sweetened tea              | Gender | Father's education | Mother's education | Residence | Type of city |
|----------------------------|--------|--------------------|--------------------|-----------|--------------|
| <i>Pearson Correlation</i> | 0.01   | - 0.05             | - 0.09**           | - 0.06    | - 0.09**     |
| <i>Sig0. (2-tailed)</i>    | 0.71   | 0.16               | 0.00               | 0.06      | 0.00         |
| <i>N</i>                   | 797    | 795                | 794                | 800       | 800          |

**Table S9.** Correlation between cocoa sugar / honey consumption and children's demographics.

| Sweetened cocoa with sugar/honey | Gender | Father's education | Mother's education | Residence | Type of city |
|----------------------------------|--------|--------------------|--------------------|-----------|--------------|
| <i>Pearson Correlation</i>       | - 0.05 | - 0.04             | - 0.09**           | - 0.05    | - 0.02       |
| <i>Sig0. (2-tailed)</i>          | 0.12   | 0.26               | 0.00               | 0.14      | 0.40         |
| <i>N</i>                         | 798    | 796                | 795                | 801       | 801          |
